# Supplementary material
Source: PubMed Central journal article supplement (PMC3894923)

Supplemental Figure. Overall survival and progression-free survival for 3 major histologies

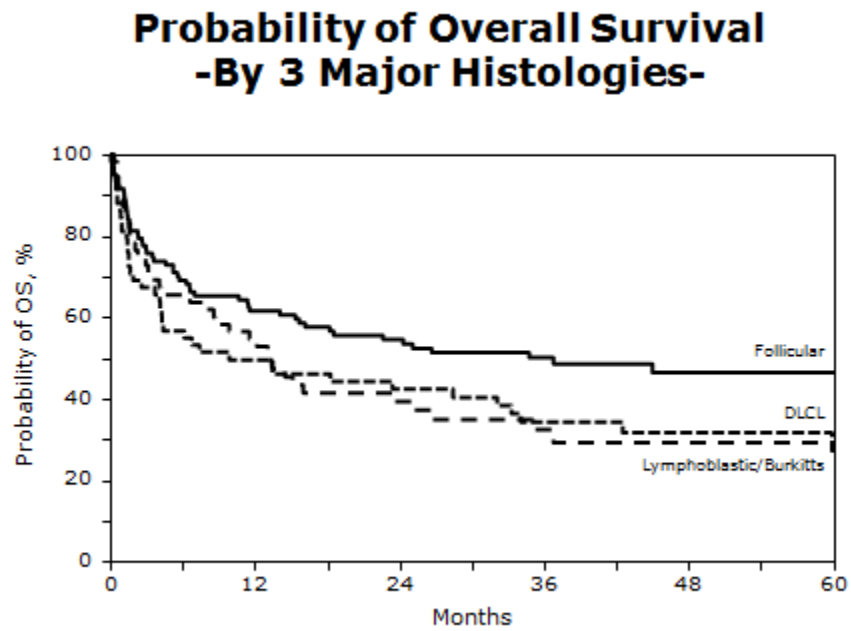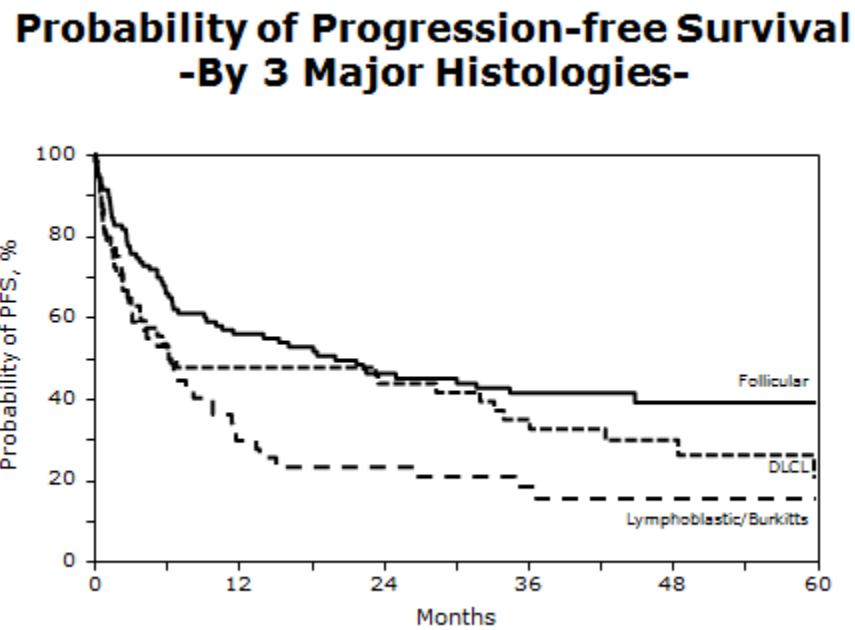

Supplement: NIHMS532547-supplement-supplement_1.pdf [file NIHMS532547-supplement-supplement_1.pdf]
